# Supplementary material for: The mechanism of the phosphoramidite synthesis of polynucleotides
Source: Royal Society of Chemistry journal article supplement (doi:10.1039/b808999j), 2008-01-01

## Supplementary information

Paper Ref.: B808999J

The mechanism of the phosphoramidite synthesis  
of polynucleotides

Mark A. Russell, Andrew P. Laws, John H.  
Atherton and Michael I Page

Example of the  $^{31}\text{P}$  NMR spectra for rate determination of thymidine phosphoramidite with 4-methoxyphenol catalysed by one molar equivalent of saccharin/*N*-methylimidazole.

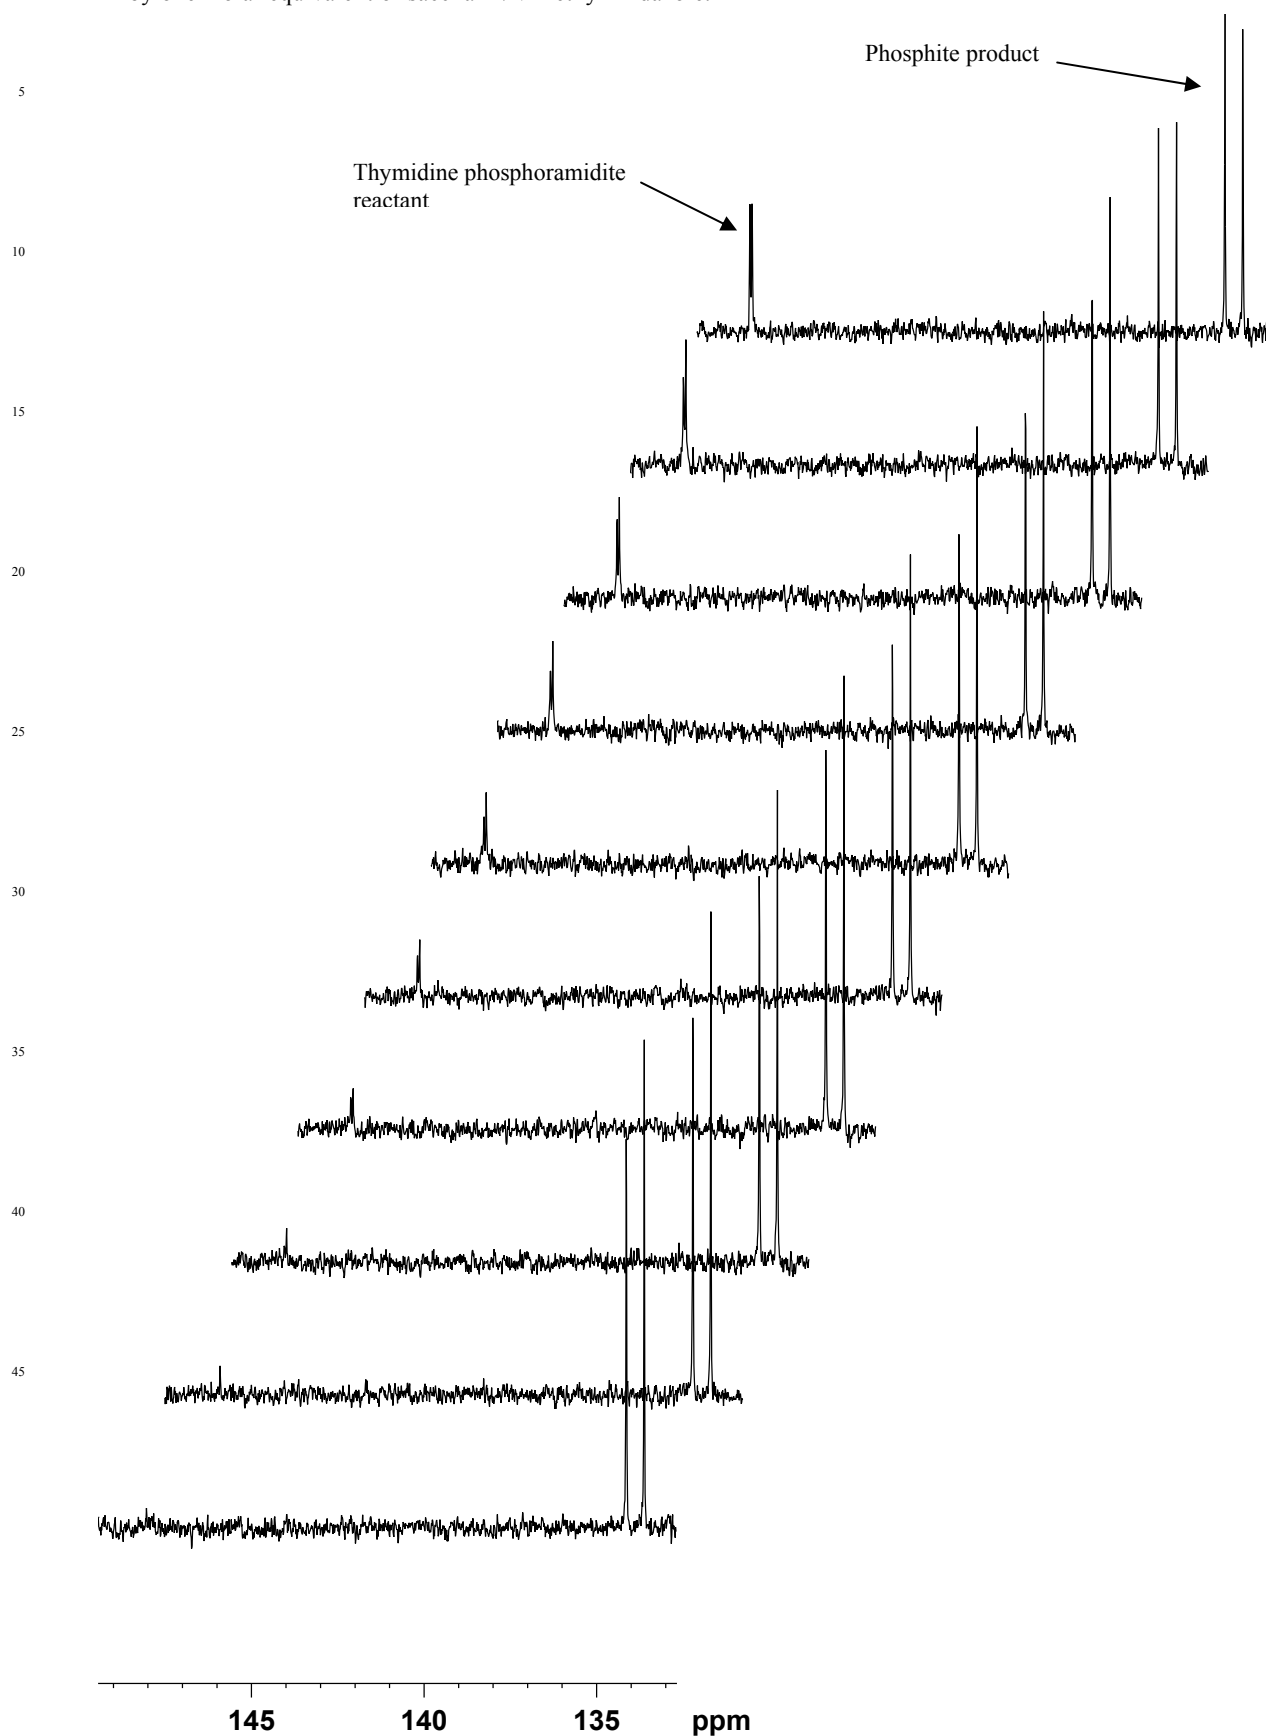

Supplement: b808999j.pdf [file b808999j.pdf]
